# Supplementary material
Source: PubMed Central journal article supplement (PMC3737717)
Supplement: supp_140.16.3348_DEV089193.pdf [file supp_140.16.3348_DEV089193.pdf]

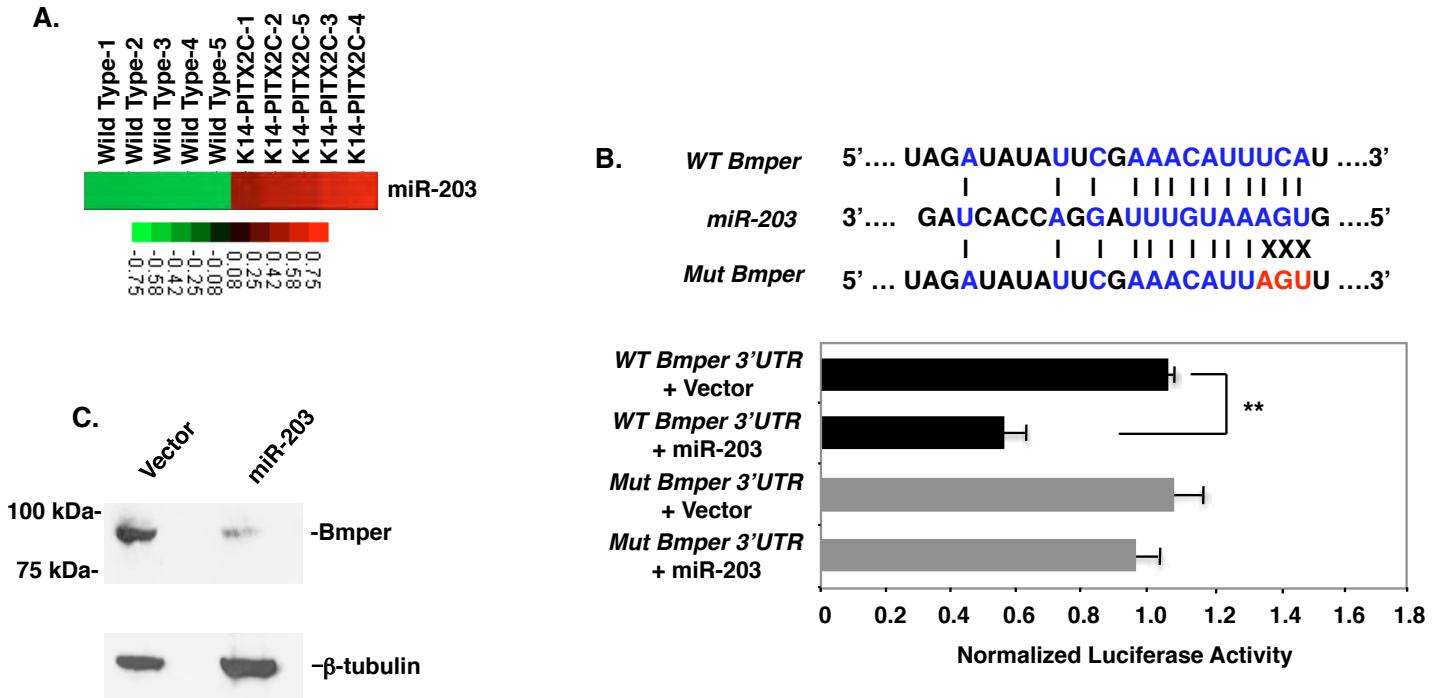

**Fig. S1. Pitx2 endogenous activation of miR-203 and inhibition of Bmper by miR-203.** (A) miR-203 expression in multiple samples from control (wild-type) and *Krt14-PITX2* overexpression mouse incisors. miR-203 is upregulated in the PITX2 overexpression mice. (B) The target sequence of miR-203 in the 3'-UTR of *Bmper* and the mutated *Bmper* 3'-UTR is shown. Normalized luciferase activity of the 3'-UTR *Bmper*-luciferase reporter (WT *Bmper* 3'UTR) with empty plasmid (Vector) or CMV-miR-203 (miR-203) shows loss of luciferase activity with expression of miR-203. There is no loss of luciferase activity when the miR-203 seed sequence is mutated (Mut *Bmper* 3'UTR). Error bars indicate  $\pm$  s.e.; five independent experiments ( $n=5$ );  $**P<0.01$ . (C) Western blot analysis shows a decrease in Bmper levels when miR-203 is overexpressed in LS-8 cells.

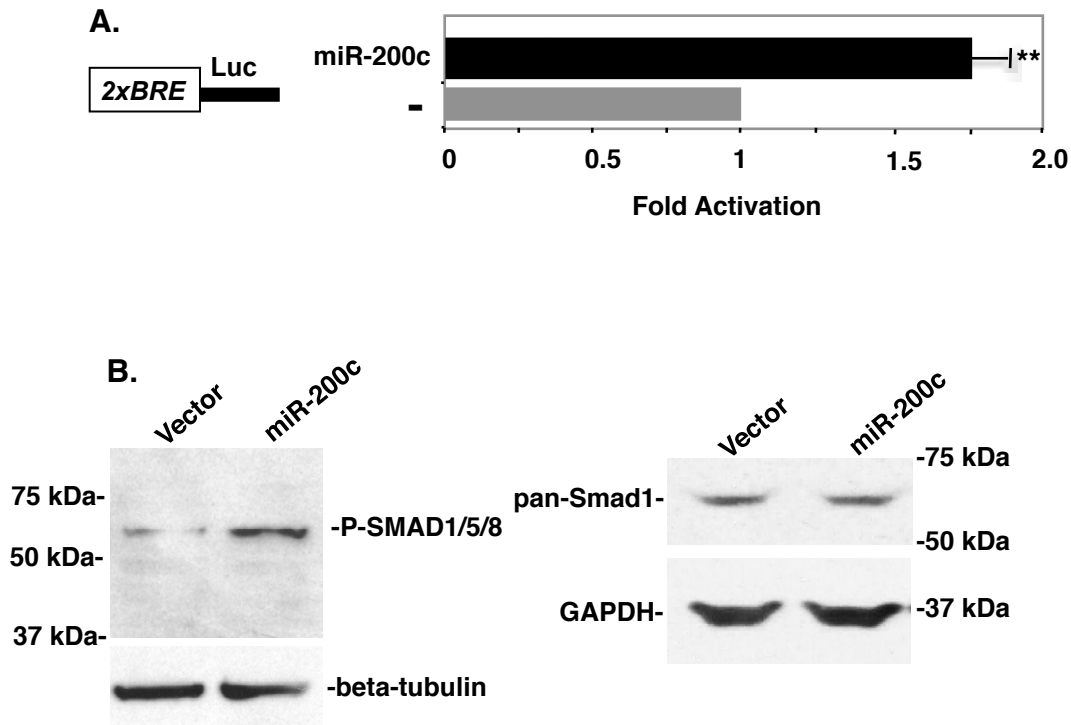

**Fig. S2. miR-200c activates Bmp signaling and p-Smad1/5/8.** (A) Luciferase activity of the Bmp reporter (2 $\times$ BRE-Luc) co-transfected with empty vector (Vector) or CMV-miR-200c (miR-200c) in LS-8 cells. Error bars indicate  $\pm$  s.e.; five independent experiments ( $n=5$ );  $**P<0.005$ . (B) Western blot analysis showing levels of phospho (p)-Smad1/5/8 upon 48-hour expression of miR-200c and pan-Smad1 in LS-8 cells.

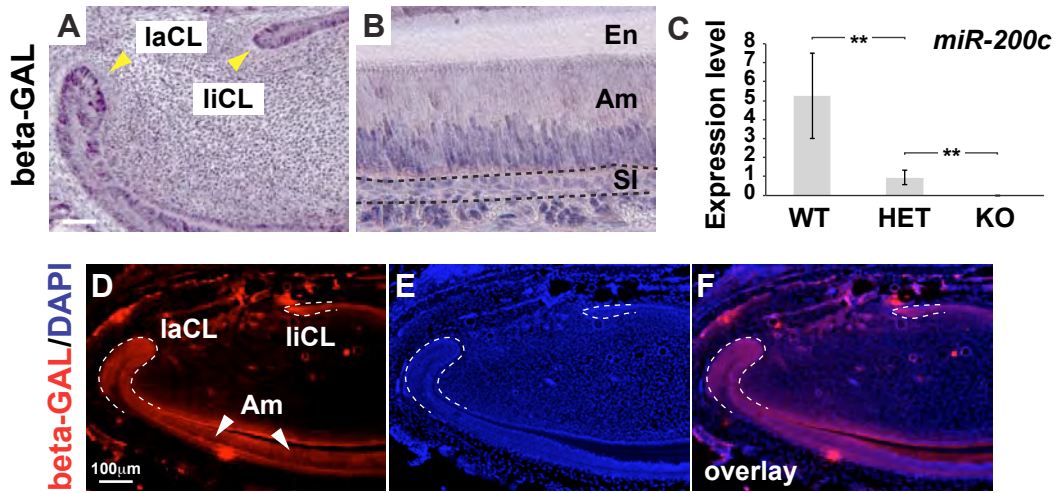

**Fig. S3. Expression of miR-200c and deletion of *miR-200c/141* in mutant mice.** (A,B) Localization of miR-200c by beta-galactosidase (beta-Gal) staining in the labial and lingual CL (laCL and liCL) in the ameloblasts (Am) and stratum intermedium (SI). (C) Confirmation of the loss of miR-200c expression in knockout mice by PCR. (D-F) Lower magnification of beta-Gal staining confirms specific expression in the LaCL, LiCL and ameloblasts. Error bars indicate  $\pm$ s.e., three independent experiments (n=5); \*\* $P$ <0.01.

**Table S1. RT-PCR primers**

| Gene          | Forward               | Reverse              |
|---------------|-----------------------|----------------------|
| <i>Nog</i>    | CGGCCAGCACTATCTACACA  | GCGTCTCGTTCAGATCCTTC |
| <i>Bmper</i>  | ATCAAAGTGCACCTGGGAACC | AGGACAGAGGACTGGCTTGA |
| <i>Htra1</i>  | CATCTCCTTCGCAATTCCAT  | GACGGTCCTTCAGCTCTTTG |
| <i>Chrdl2</i> | CAGGTGTACACGTTGGCATC  | TCTGGAGTCTGGGCTAGGAA |
| <i>Amel</i>   | TTTTGCTATGCCCTACCAC   | GTGATGAGGCTGAAGGGTGT |
